# Supplementary material for: Efficacy and Safety of Fuzi Formulae on the Treatment of Heart Failure as Complementary Therapy: A Systematic Review and Meta-Analysis of High-Quality Randomized Controlled Trials
Source: Hindawi journal article supplement (doi:10.1155/2019/9728957), 2019-12-24

## Appendix1

The search strategy of PubMed was as follows:

#1 Search (((((((((((Heart failure[Title/Abstract]) OR Cardiac Failure[Title/Abstract]) OR Heart Decompensation[Title/Abstract]) OR Decompensation, Heart[Title/Abstract]) OR Heart Failure, Right-Sided[Title/Abstract]) OR Heart Failure, Right Sided[Title/Abstract]) OR Right-Sided Heart Failure[Title/Abstract]) OR Right Sided Heart Failure[Title/Abstract]) OR Myocardial Failure[Title/Abstract]) OR Congestive Heart Failure[Title/Abstract]) OR Heart Failure, Congestive[Title/Abstract]) OR Heart Failure, Left-Sided[Title/Abstract]) OR Heart Failure, Left Sided[Title/Abstract]) OR Left-Sided Heart Failure[Title/Abstract]) OR Left Sided Heart Failure[Title/Abstract]

#2 Search (((((((((((Traditional Chinese medicine[Title/Abstract]) OR Chung I Hsueh[Title/Abstract]) OR Hsueh, Chung I[Title/Abstract]) OR Traditional Medicine, Chinese[Title/Abstract]) OR Zhong Yi Xue[Title/Abstract]) OR Chinese Traditional Medicine[Title/Abstract]) OR Chinese Medicine, Traditional[Title/Abstract]) OR Chinese Medicine, Traditional[Title/Abstract]) OR Tongue Diagnoses, Traditional[Title/Abstract]) OR Tongue Diagnosis, Traditional[Title/Abstract]) OR Traditional Tongue Diagnoses[Title/Abstract]) OR Traditional Tongue Assessment[Title/Abstract]) OR Tongue Assessment, Traditional[Title/Abstract]) OR Traditional Tongue Assessments[Title/Abstract]

#1 AND #2

## Appendix2

Step1: Design excel for each outcome

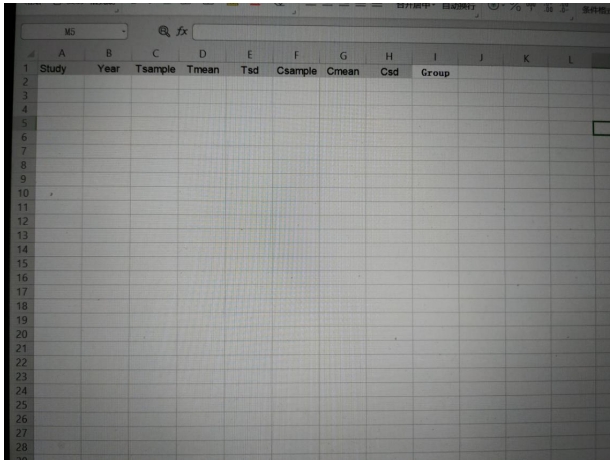

The image shows a screenshot of an Excel spreadsheet. The columns are labeled as follows: A: Study, B: Year, C: Tsample, D: Tmean, E: Tsd, F: Csample, G: Cmean, H: Csd, I: Group. The rows are numbered from 1 to 28. The spreadsheet is currently empty.

Step2: Import data form included trails into excel

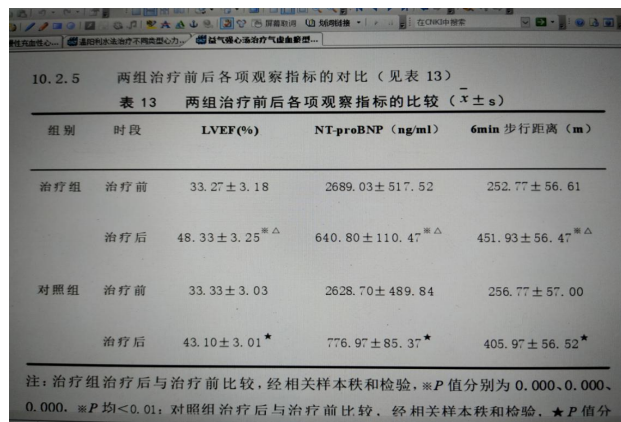

The image shows a screenshot of a document containing a table. The table is titled "表 13 两组治疗前后各项观察指标的比较 ( $\bar{x} \pm s$ )". The table has four columns: 组别 (Group), 时段 (Time Point), LVEF(%), NT-proBNP (ng/ml), and 6min 步行距离 (m). The data is as follows:

| 组别  | 时段  | LVEF(%)                    | NT-proBNP (ng/ml)             | 6min 步行距离 (m)                |
|-----|-----|----------------------------|-------------------------------|------------------------------|
| 治疗组 | 治疗前 | 33.27 ± 3.18               | 2689.03 ± 517.52              | 252.77 ± 56.61               |
|     | 治疗后 | 48.33 ± 3.25 <sup>※△</sup> | 640.80 ± 110.47 <sup>※△</sup> | 451.93 ± 56.47 <sup>※△</sup> |
| 对照组 | 治疗前 | 33.33 ± 3.03               | 2628.70 ± 489.84              | 256.77 ± 57.00               |
|     | 治疗后 | 43.10 ± 3.01 <sup>★</sup>  | 776.97 ± 85.37 <sup>★</sup>   | 405.97 ± 56.52 <sup>★</sup>  |

注: 治疗组治疗后与治疗前比较, 经相关样本秩和检验, ※P 值分别为 0.000、0.000、0.000, ※P 均 < 0.01; 对照组治疗后与治疗前比较, 经相关样本秩和检验, ★P 值分

| Study | Year | Tsample | Tmean   | Tsd     | Csample | Cmean  | Csd     | Group                                |
|-------|------|---------|---------|---------|---------|--------|---------|--------------------------------------|
| Zou   | 2005 | 48      | 213.9   | 51.5    | 47      | 403.5  | 53.1    | CHFST plus FZF vs CHFST              |
| Hao   | 2005 |         |         |         |         |        |         | FZF vs Digoxin                       |
| Liu   | 2007 |         |         |         |         |        |         | CHFST plus FZF vs CHFST plus placebo |
| Wang  | 2010 | 30      | 3186.6  | 2717    | 30      | 4455.8 | 3859    | CHFST plus FZF vs CHFST              |
| Cao   | 2011 |         |         |         |         |        |         | FZF vs Digoxin                       |
| Zou   | 2011 |         |         |         |         |        |         | CHFST plus FZF vs CHFST plus placebo |
| Li    | 2013 |         |         |         |         |        |         | CHFST plus FZF vs CHFST plus placebo |
| Dong  | 2014 | 54      | 760.57  | 442.05  | 53      | 980.36 | 402.7   | CHFST plus FZF vs CHFST              |
| Wei   | 2015 | 30      | 1353.4  | 188.3   | 30      | 2105.6 | 123.3   | CHFST plus FZF vs CHFST              |
| Li    | 2015 | 30      | 242.6   | 149.14  | 29      | 364.62 | 214.57  | CHFST plus FZF vs CHFST              |
| Wu    | 2015 | 30      | 242.6   | 149.14  | 29      | 364.62 | 214.57  | CHFST plus FZF vs CHFST              |
| Wei   | 2017 | 51      | 1410.69 | 1205.56 | 50      | 1941   | 1309.22 | CHFST plus FZF vs CHFST              |
| Zhu   | 2018 | 30      | 640.8   | 110.47  | 30      | 776.97 | 85.37   | CHFST plus FZF vs CHFST              |
| Wang  | 2019 |         |         |         |         |        |         | CHFST plus FZF vs CHFST plus placebo |

Step3: Import the excel into Review Manager2 software, use random effect model to calculate the effective rate

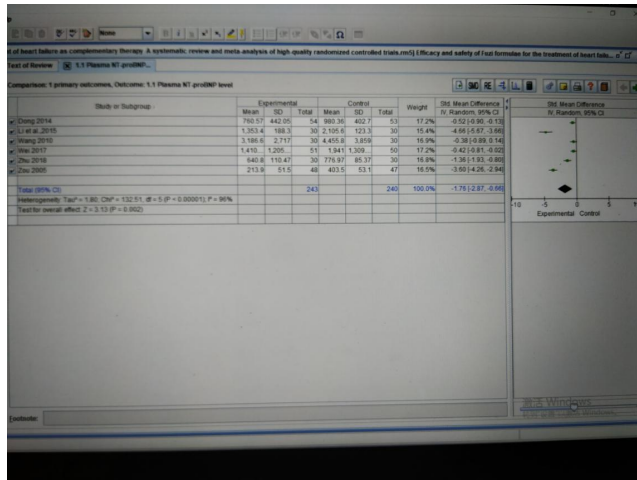

Step4: Finally, we could see the risk ratio from the forest plot

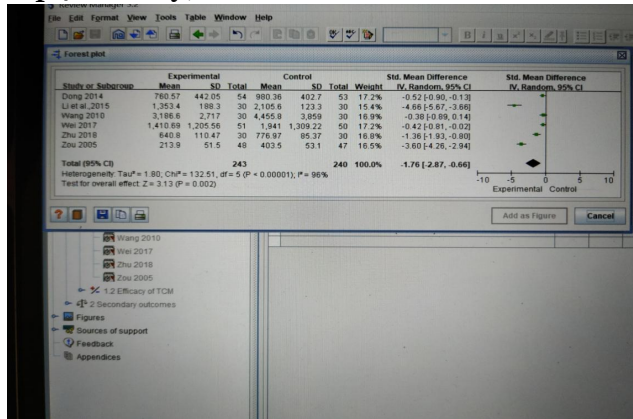

Supplement: f1 [file 9728957.f1.pdf]
